# Supplementary material for: Comparison of metabolic pathways of different α-N-heterocyclic thiosemicarbazones
Source: PubMed Central journal article supplement (PMC5849672; doi:10.1007/s00216-018-0889-x), 2018-02-23
Supplement: 216_2018_889_MOESM1_ESM.pdf [file 216_2018_889_MOESM1_ESM.pdf]

## **Analytical and Bioanalytical Chemistry**

### **Electronic Supplementary Material**

#### **Comparison of metabolic pathways of different $\alpha$ -*N*-heterocyclic thiosemicarbazones**

Karla Pelivan, Lisa M. Frensemeier, Uwe Karst, Gunda Koellensperger, Petra Heffeter, Bernhard K. Keppler, Christian R. Kowol

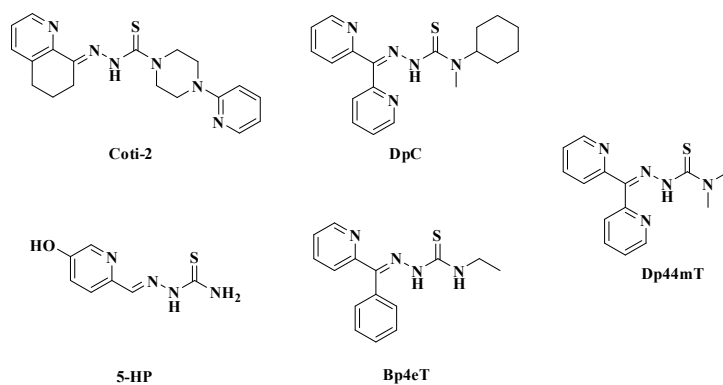

**Scheme S1** Molecular structures of Triapine, Coti-2, DpC, 5-HP, Dp44mT and Bp4eT

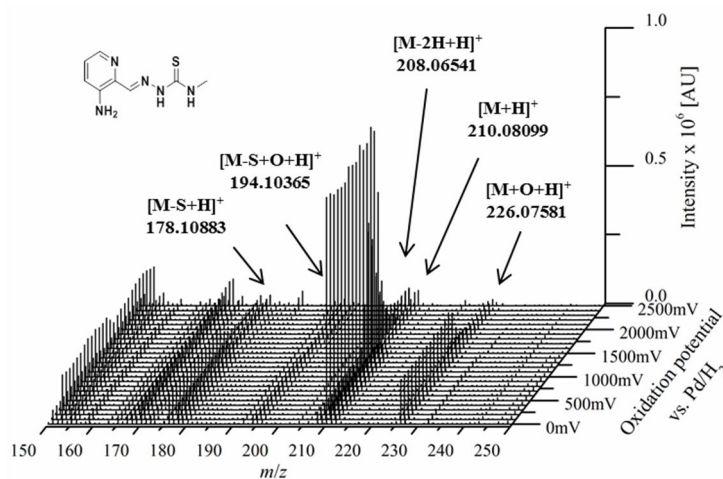

**Fig. S1** Mass voltammogram of thiosemicarbazone 1

**Table S1** Metabolites of compound 1 detected by EC/MS

| Modification                         | Sum formula                                                    | Detected <i>m/z</i> | Theoretical <i>m/z</i> | Rel. deviation [ppm] | Metabolic reaction                      |
|--------------------------------------|----------------------------------------------------------------|---------------------|------------------------|----------------------|-----------------------------------------|
| [M+H] <sup>+</sup>                   | C <sub>8</sub> H <sub>12</sub> N <sub>5</sub> S                | 210.08099           | 210.08079              | 0.94                 | –                                       |
| [M–NH–CH <sub>3</sub> ] <sup>+</sup> | C <sub>7</sub> H <sub>7</sub> N <sub>4</sub> S                 | 179.03859           | 179.03873              | 0.76                 | –                                       |
| [M–2H+H] <sup>+</sup>                | C <sub>8</sub> H <sub>10</sub> N <sub>5</sub> S                | 208.06541           | 208.06514              | 1.29                 | Dehydrogenation                         |
| [M–4H+H] <sup>+</sup>                | C <sub>8</sub> H <sub>8</sub> N <sub>5</sub> S                 | 206.04944           | 206.04949              | 0.26                 | Dehydrogenation                         |
| [M+O+H] <sup>+</sup>                 | C <sub>8</sub> H <sub>12</sub> N <sub>5</sub> SO               | 226.07581           | 226.07571              | 0.45                 | Hydroxylation                           |
| [M+O–2H+H] <sup>+</sup>              | C <sub>8</sub> H <sub>10</sub> N <sub>5</sub> SO               | 224.06027           | 224.06006              | 0.95                 | Hydroxylation/<br>Dehydrogenation       |
| [M–S+O+H] <sup>+</sup>               | C <sub>8</sub> H <sub>12</sub> N <sub>5</sub> O                | 194.10365           | 194.10363              | 0.07                 | Desulfuration                           |
| [M–S+O–2H+H] <sup>+</sup>            | C <sub>8</sub> H <sub>10</sub> N <sub>5</sub> O                | 192.08795           | 192.08799              | 0.19                 | Desulfuration/<br>Dehydrogenation       |
| [M–S+H] <sup>+</sup>                 | C <sub>8</sub> H <sub>12</sub> N <sub>5</sub>                  | 178.10883           | 178.10872              | 0.61                 | Desulfuration                           |
| [M–S–2H+H] <sup>+</sup>              | C <sub>8</sub> H <sub>10</sub> N <sub>5</sub>                  | 176.09323           | 176.09307              | 0.90                 | Desulfuration/<br>Dehydrogenation       |
| [2M–2H+H] <sup>+</sup>               | C <sub>16</sub> H <sub>21</sub> N <sub>10</sub> S <sub>2</sub> | 417.13864           | 417.13866              | 0.05                 | Disulfide formation                     |
| [2M–4H+H] <sup>+</sup>               | C <sub>16</sub> H <sub>19</sub> N <sub>10</sub> S <sub>2</sub> | 415.12299           | 415.12301              | 0.05                 | Disulfide formation/<br>Dehydrogenation |
| [2M–6H+H] <sup>+</sup>               | C <sub>16</sub> H <sub>17</sub> N <sub>10</sub> S <sub>2</sub> | 413.10745           | 413.10736              | 0.22                 | Disulfide formation/<br>Dehydrogenation |

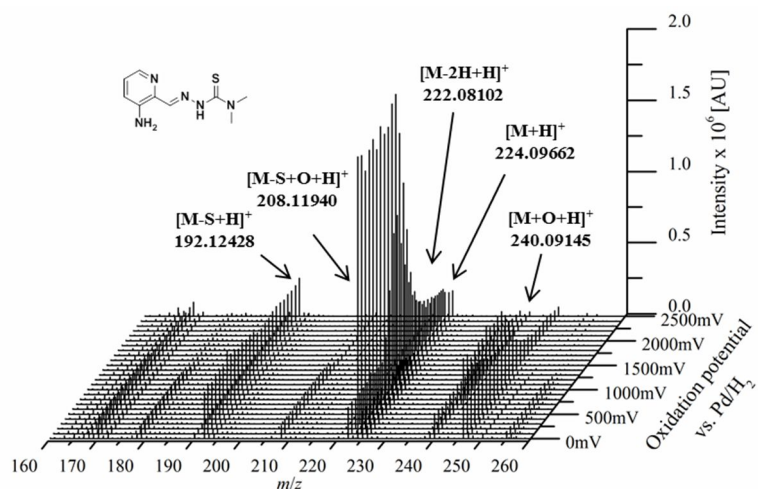

**Fig. S2** Mass voltammogram of thiosemicarbazone **2**

**Table S2** Metabolites of compound **2** detected by EC/MS

| Modification      | Sum formula             | Detected $m/z$ | Theoretical $m/z$ | Rel. deviation [ppm] | Metabolic reaction                      |
|-------------------|-------------------------|----------------|-------------------|----------------------|-----------------------------------------|
| $[M+H]^+$         | $C_9H_{14}N_5S$         | 224.09662      | 224.09644         | 0.79                 | —                                       |
| $[M-N-2xCH_3]^+$  | $C_7H_7N_4S$            | 179.03865      | 179.03873         | 0.32                 | —                                       |
| $[M-2H+H]^+$      | $C_9H_{12}N_5S$         | 222.08102      | 222.08079         | 1.02                 | Dehydrogenation                         |
| $[M-4H+H]^+$      | $C_9H_{10}N_5S$         | 220.06538      | 220.06514         | 1.08                 | Dehydrogenation                         |
| $[M+O+H]^+$       | $C_9H_{14}N_5SO$        | 240.09145      | 240.09136         | 0.39                 | Hydroxylation                           |
| $[M+O-2H+H]^+$    | $C_9H_{12}N_5SO$        | 238.07587      | 238.07571         | 0.68                 | Hydroxylation/<br>Dehydrogenation       |
| $[M+O-4H+H]^+$    | $C_9H_{10}N_5SO$        | 236.06026      | 236.06006         | 0.86                 | Hydroxylation/<br>Dehydrogenation       |
| $[M-S+O+H]^+$     | $C_9H_{14}N_5O$         | 208.11940      | 208.11929         | 0.55                 | Desulfuration                           |
| $[M-S+O-2H+H]^+$  | $C_9H_{12}N_5O$         | 206.10374      | 206.10364         | 0.50                 | Desulfuration/<br>Dehydrogenation       |
| $[M-S+H]^+$       | $C_9H_{14}N_5$          | 192.12428      | 192.12437         | 0.48                 | Desulfuration                           |
| $[M-S-2H+H]^+$    | $C_9H_{12}N_5$          | 190.10878      | 190.10872         | 0.31                 | Desulfuration/<br>Dehydrogenation       |
| $[M-CH_2+H]^+$    | $C_8H_{12}N_5S$         | 210.08044      | 210.08079         | 1.68                 | Demethylation*                          |
| $[M-CH_2-2H+H]^+$ | $C_8H_{10}N_5S$         | 208.06487      | 208.06514         | 1.31                 | Demethylation/<br>Dehydrogenation*      |
| $[2M-2H+H]^+$     | $C_{18}H_{25}N_{10}S_2$ | 445.17007      | 445.16996         | 0.25                 | Disulfide formation                     |
| $[2M-4H+H]^+$     | $C_{18}H_{23}N_{10}S_2$ | 443.15433      | 443.15431         | 0.05                 | Disulfide formation/<br>Dehydrogenation |
| $[2M-6H+H]^+$     | $C_{18}H_{21}N_{10}S_2$ | 441.13870      | 441.13866         | 0.09                 | Disulfide formation/<br>Dehydrogenation |

\*observed after electrochemical oxidation only via LC-HRMS, but not via EC-HRMS

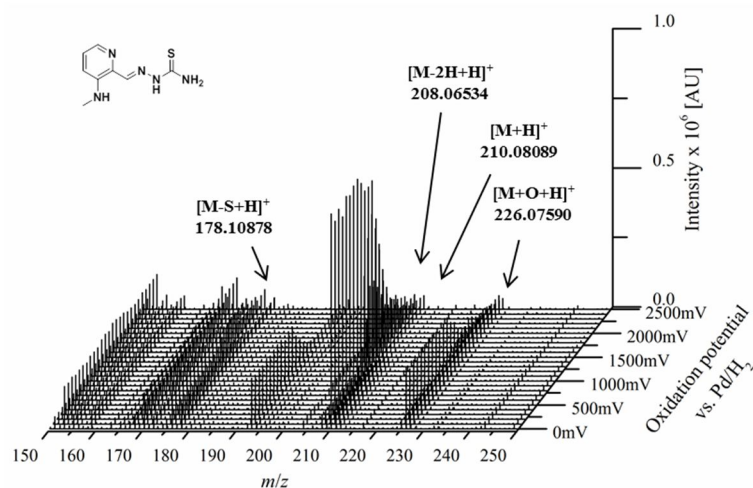

Fig. S3 Mass voltammogram of thiosemicarbazone 3

Table S3 Metabolites of compound 3 detected by EC/MS

| Modification      | Sum formula             | Detected $m/z$ | Theoretical $m/z$ | Rel. deviation [ppm] | Metabolic reaction                      |
|-------------------|-------------------------|----------------|-------------------|----------------------|-----------------------------------------|
| $[M+H]^+$         | $C_8H_{12}N_5S$         | 210.08089      | 210.08079         | 0.46                 | –                                       |
| $[M-NH_2]^+$      | $C_8H_9N_4S$            | 193.05434      | 193.05424         | 0.50                 | –                                       |
| $[M-2H+H]^+$      | $C_8H_{10}N_5S$         | 208.06534      | 208.06514         | 0.05                 | Dehydrogenation                         |
| $[M-4H+H]^+$      | $C_8H_8N_5S$            | 206.04982      | 206.04949         | 1.59                 | Dehydrogenation                         |
| $[M+O+H]^+$       | $C_8H_{12}N_5SO$        | 226.07590      | 226.07571         | 0.85                 | Hydroxylation                           |
| $[M+O-2H+H]^+$    | $C_8H_{10}N_5SO$        | 224.06024      | 224.06006         | 0.82                 | Hydroxylation/<br>Dehydrogenation       |
| $[M+O-4H+H]^+$    | $C_8H_8N_5SO$           | 222.04442      | 222.04441         | 0.06                 | Hydroxylation/<br>Dehydrogenation       |
| $[M-S+H]^+$       | $C_8H_{12}N_5$          | 178.10878      | 178.10872         | 0.33                 | Desulfuration                           |
| $[M-S-2H+H]^+$    | $C_8H_{10}N_5$          | 176.09320      | 176.09307         | 0.73                 | Desulfuration/<br>Dehydrogenation       |
| $[M-S-4H+H]^+$    | $C_8H_8N_5$             | 174.07756      | 174.07742         | 0.79                 | Desulfuration/<br>Dehydrogenation       |
| $[M-CH_2-2H+H]^+$ | $C_7H_8N_5S$            | 194.04926      | 194.04949         | 1.20                 | Demethylation/<br>Dehydrogenation*      |
| $[2M-2H+H]^+$     | $C_{16}H_{21}N_{10}S_2$ | 417.13898      | 417.13866         | 0.77                 | Disulfide formation                     |
| $[2M-4H+H]^+$     | $C_{16}H_{19}N_{10}S_2$ | 415.12317      | 415.12301         | 0.39                 | Disulfide formation/<br>Dehydrogenation |
| $[2M-6H+H]^+$     | $C_{16}H_{17}N_{10}S_2$ | 413.10748      | 413.10736         | 0.29                 | Disulfide formation/<br>Dehydrogenation |

\*observed after electrochemical oxidation only via LC-HRMS, but not via EC-HRMS

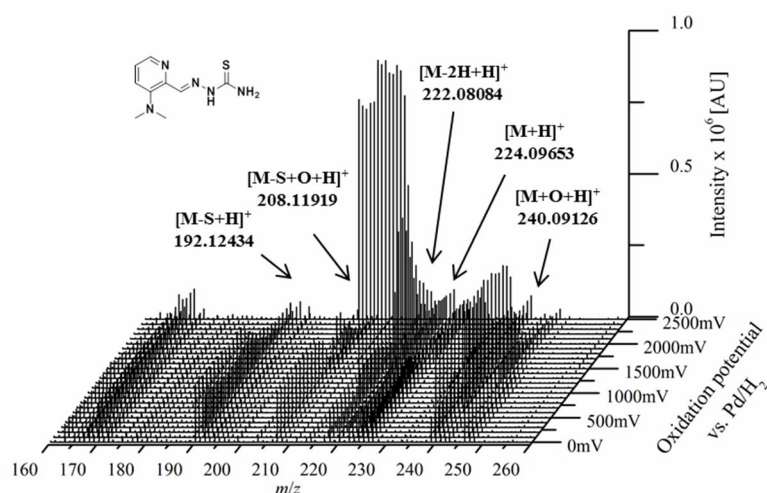

**Fig. S4** Mass voltammogram of thiosemicarbazone **4**

**Table S4** Metabolites of compound **4** detected by EC/MS

| Modification        | Sum formula             | Detected $m/z$ | Theoretical $m/z$ | Rel. deviation [ppm] | Metabolic reaction                      |
|---------------------|-------------------------|----------------|-------------------|----------------------|-----------------------------------------|
| $[M+H]^+$           | $C_9H_{14}N_5S$         | 224.09653      | 224.09644         | 0.39                 | –                                       |
| $[M-NH_2]^+$        | $C_9H_{11}N_4S$         | 207.06984      | 207.06989         | 0.26                 |                                         |
| $[M-2H+H]^+$        | $C_9H_{12}N_5S$         | 222.08084      | 222.08079         | 0.21                 | Dehydrogenation                         |
| $[M-4H+H]^+$        | $C_9H_{10}N_5S$         | 220.06526      | 220.06514         | 0.53                 | Dehydrogenation                         |
| $[M+O+H]^+$         | $C_9H_{14}N_5SO$        | 240.09126      | 240.09136         | 0.41                 | Hydroxylation                           |
| $[M+O-2H+H]^+$      | $C_9H_{12}N_5SO$        | 238.07567      | 238.07571         | 0.16                 | Hydroxylation/<br>Dehydrogenation       |
| $[M+O-4H+H]^+$      | $C_9H_{10}N_5SO$        | 236.06000      | 236.06006         | 0.24                 | Hydroxylation/<br>Dehydrogenation       |
| $[M-S+O+H]^+$       | $C_9H_{14}N_5O$         | 208.11919      | 208.11929         | 0.46                 | Desulfuration                           |
| $[M-S+O-2H+H]^+$    | $C_9H_{12}N_5O$         | 206.10382      | 206.10364         | 0.89                 | Desulfuration/<br>Dehydrogenation       |
| $[M-S+H]^+$         | $C_9H_{14}N_5$          | 192.12434      | 192.12437         | 0.17                 | Desulfuration                           |
| $[M-S-2H+H]^+$      | $C_9H_{12}N_5$          | 190.10870      | 190.10872         | 0.12                 | Desulfuration/<br>Dehydrogenation       |
| $[M-CH_2+H]^+$      | $C_8H_{12}N_5S$         | 210.08064      | 210.08079         | 0.73                 | Demethylation                           |
| $[M-CH_2-2H+H]^+$   | $C_8H_{10}N_5S$         | 208.06523      | 208.06514         | 0.42                 | Demethylation/<br>Dehydrogenation       |
| $[M-CH_2-4H+H]^+$   | $C_8H_8N_5S$            | 206.04961      | 206.04949         | 0.57                 | Demethylation/<br>Dehydrogenation       |
| $[M-2xCH_2-2H+H]^+$ | $C_7H_8N_5S$            | 194.04929      | 194.04949         | 1.04                 | Demethylation/<br>Dehydrogenation*      |
| $[2M-2H+H]^+$       | $C_{18}H_{25}N_{10}S_2$ | 445.16980      | 445.16996         | 0.36                 | Disulfide formation                     |
| $[2M-4H+H]^+$       | $C_{18}H_{23}N_{10}S_2$ | 443.15448      | 443.15431         | 0.39                 | Disulfide formation/<br>Dehydrogenation |

\*observed after electrochemical oxidation only via LC-HRMS, but not via EC-HRMS

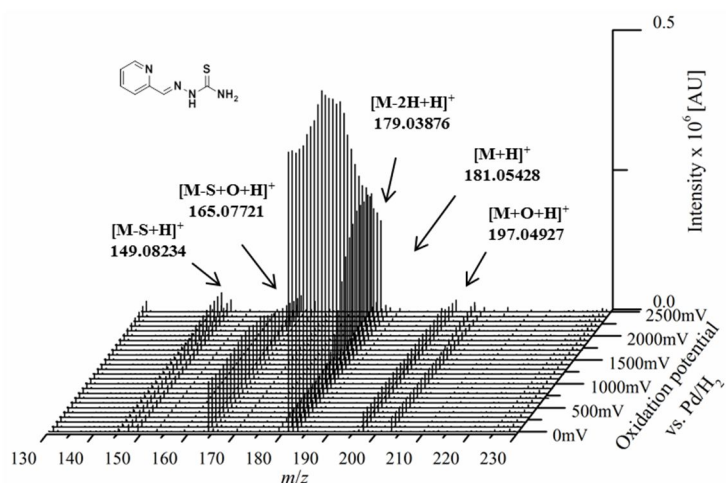

**Fig. S5** Mass voltammogram of thiosemicarbazone **6**

**Table S5** Metabolites of compound **6** detected by EC/MS

| Modification     | Sum formula          | Detected $m/z$ | Theoretical $m/z$ | Rel. deviation [ppm] | Metabolic reaction                      |
|------------------|----------------------|----------------|-------------------|----------------------|-----------------------------------------|
| $[M+H]^+$        | $C_7H_9N_4S$         | 181.05428      | 181.05424         | 0.20                 | –                                       |
| $[M-NH_2]^+$     | $C_7H_8N_3S$         | 164.02782      | 164.02769         | 0.77                 |                                         |
| $[M-2H+H]^+$     | $C_7H_7N_4S$         | 179.03876      | 179.03859         | 0.93                 | Dehydrogenation                         |
| $[M+O+H]^+$      | $C_7H_9N_4SO$        | 197.04927      | 197.04916         | 0.57                 | Hydroxylation                           |
| $[M-S+O+H]^+$    | $C_7H_9N_4O$         | 165.07721      | 165.07709         | 0.74                 | Desulfuration                           |
| $[M-S+O-2H+H]^+$ | $C_7H_7N_4O$         | 163.06158      | 163.06144         | 0.87                 | Desulfuration/<br>Dehydrogenation       |
| $[M-S+H]^+$      | $C_7H_9N_4$          | 149.08234      | 149.08217         | 1.12                 | Desulfuration                           |
| $[M-S-2H+H]^+$   | $C_7H_7N_4$          | 147.06664      | 147.06652         | 0.80                 | Desulfuration/<br>Dehydrogenation       |
| $[2M-2H+H]^+$    | $C_{14}H_{15}N_8S_2$ | 359.08566      | 359.08556         | 0.28                 | Disulfide formation                     |
| $[2M-4H+H]^+$    | $C_{14}H_{13}N_8S_2$ | 357.07013      | 357.06991         | 0.62                 | Disulfide formation/<br>Dehydrogenation |

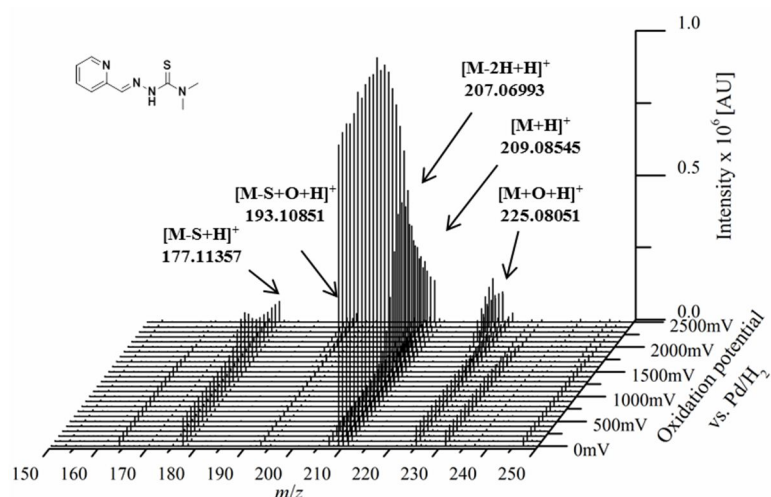

**Fig. S6** Mass voltammogram of thiosemicarbazone **8**

**Table S6** Metabolites of compound **8** detected by EC/MS

| Modification        | Sum formula          | Detected $m/z$ | Theoretical $m/z$ | Rel. deviation [ppm] | Metabolic reaction                      |
|---------------------|----------------------|----------------|-------------------|----------------------|-----------------------------------------|
| $[M+H]^+$           | $C_9H_{13}N_4S$      | 209.08545      | 209.08554         | 0.49                 | –                                       |
| $[M-N-2xCH_3]^+$    | $C_7H_6N_3S$         | 164.02774      | 164.02769         | 0.28                 |                                         |
| $[M-2H+H]^+$        | $C_9H_{11}N_4S$      | 207.06993      | 207.06989         | 0.18                 | Dehydrogenation                         |
| $[M-4H+H]^+$        | $C_9H_9N_4S$         | 205.05449      | 205.05424         | 1.20                 | Dehydrogenation                         |
| $[M+O+H]^+$         | $C_9H_{13}N_4SO$     | 225.08051      | 225.08046         | 0.23                 | Hydroxylation                           |
| $[M+O-2H+H]^+$      | $C_9H_{11}N_4SO$     | 223.06491      | 223.06481         | 0.46                 | Hydroxylation/<br>Dehydrogenation       |
| $[M+O-4H+H]^+$      | $C_9H_9N_4SO$        | 221.04927      | 221.04916         | 0.51                 | Hydroxylation/<br>Dehydrogenation       |
| $[M-S+O+H]^+$       | $C_9H_{13}N_4O$      | 193.10851      | 193.10839         | 0.63                 | Desulfuration                           |
| $[M-S+O-2H+H]^+$    | $C_9H_{11}N_4O$      | 191.09264      | 191.09274         | 0.51                 | Desulfuration/<br>Dehydrogenation       |
| $[M-S+H]^+$         | $C_9H_{13}N_4$       | 177.11357      | 177.11347         | 0.55                 | Desulfuration                           |
| $[M-S-2H+H]^+$      | $C_9H_{11}N_4$       | 175.09785      | 175.09782         | 0.16                 | Desulfuration/<br>Dehydrogenation       |
| $[M-CH_2-2H+H]^+$   | $C_8H_9N_4S$         | 193.05426      | 193.05424         | 0.09                 | Demethylation/<br>Dehydrogenation       |
| $[M-2xCH_2-2H+H]^+$ | $C_7H_7N_4S$         | 179.03838      | 179.03859         | 1.19                 | Demethylation/<br>Dehydrogenation*      |
| $[2M-2H+H]^+$       | $C_{18}H_{23}N_8S_2$ | 415.14828      | 415.14816         | 0.29                 | Disulfide formation                     |
| $[2M-4H+H]^+$       | $C_{18}H_{21}N_8S_2$ | 413.13266      | 413.13251         | 0.36                 | Disulfide formation/<br>Dehydrogenation |

\*observed after electrochemical oxidation only via LC-HRMS, but not via EC-HRMS

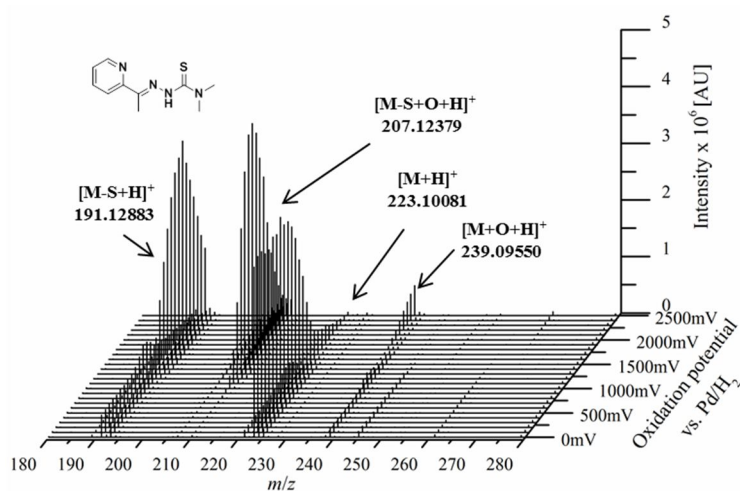

**Fig. S7** Mass voltammogram of thiosemicarbazone **9**

**Table S7** Metabolites of compound **9** detected by EC/MS

| Modification        | Sum formula          | Detected $m/z$ | Theoretical $m/z$ | Rel. deviation [ppm] | Metabolic reaction                      |
|---------------------|----------------------|----------------|-------------------|----------------------|-----------------------------------------|
| $[M+H]^+$           | $C_{10}H_{15}N_4S$   | 223.10081      | 223.10119         | 1.72                 | –                                       |
| $[M-N-2xCH_3]^+$    | $C_8H_8N_3S$         | 178.04292      | 178.04334         | 2.39                 |                                         |
| $[M+O+H]^+$         | $C_{10}H_{15}N_4SO$  | 239.09550      | 239.09611         | 2.54                 | Hydroxylation                           |
| $[M+O-2H+H]^+$      | $C_{10}H_{13}N_4SO$  | 237.07994      | 237.08046         | 2.19                 | Hydroxylation/<br>Dehydrogenation       |
| $[M-S+O+H]^+$       | $C_{10}H_{15}N_4O$   | 207.12379      | 207.12404         | 1.20                 | Desulfuration                           |
| $[M-S+O-2H+H]^+$    | $C_{10}H_{13}N_4O$   | 205.10796      | 205.10839         | 2.09                 | Desulfuration/<br>Dehydrogenation       |
| $[M-S+H]^+$         | $C_{10}H_{15}N_4$    | 191.12883      | 191.12912         | 1.53                 | Desulfuration                           |
| $[M-S-2H+H]^+$      | $C_{10}H_{13}N_4$    | 189.11314      | 189.11347         | 1.76                 | Desulfuration/<br>Dehydrogenation       |
| $[M-CH_2-2H+H]^+$   | $C_9H_{11}N_4S$      | 207.06976      | 207.06989         | 0.65                 | Demethylation/<br>Dehydrogenation*      |
| $[M-2xCH_2-2H+H]^+$ | $C_8H_9N_4S$         | 193.05423      | 193.05424         | 0.07                 | Demethylation/<br>Dehydrogenation*      |
| $[M-3xCH_2-2H+H]^+$ | $C_7H_7N_4S$         | 179.03842      | 179.03859         | 0.97                 | Demethylation/<br>Dehydrogenation*      |
| $[2M-2H+H]^+$       | $C_{20}H_{25}N_8S_2$ | 441.16302      | 441.16381         | 1.79                 | Disulfide formation                     |
| $[2M-4H+H]^+$       | $C_{20}H_{23}N_8S_2$ | 439.14792      | 439.14816         | 0.55                 | Disulfide formation/<br>Dehydrogenation |

\*observed after electrochemical oxidation only via LC-HRMS, but not via EC-HRMS



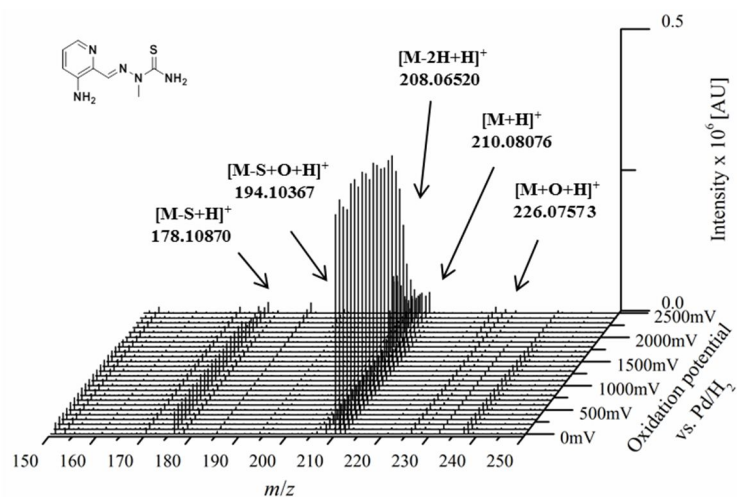

**Fig. S8** Mass voltammogram of thiosemicarbazone **10**

**Table S8** Metabolites of compound **10** detected by EC/MS

| Modification     | Sum formula             | Detected $m/z$ | Theoretical $m/z$ | Rel. deviation [ppm] | Metabolic reaction                      |
|------------------|-------------------------|----------------|-------------------|----------------------|-----------------------------------------|
| $[M+H]^+$        | $C_8H_{12}N_5S$         | 210.08076      | 210.08079         | 0.16                 | –                                       |
| $[M-2H+H]^+$     | $C_8H_{10}N_5S$         | 208.06520      | 208.06514         | 0.28                 | Dehydrogenation                         |
| $[M-4H+H]^+$     | $C_8H_8N_5S$            | 206.04945      | 206.04949         | 0.21                 | Dehydrogenation                         |
| $[M+O+H]^+$      | $C_8H_{12}N_5SO$        | 226.07573      | 226.07571         | 0.10                 | Hydroxylation                           |
| $[M+O-2H+H]^+$   | $C_8H_{10}N_5SO$        | 224.06000      | 224.06006         | 0.26                 | Hydroxylation/<br>Dehydrogenation       |
| $[M+O-4H+H]^+$   | $C_8H_8N_5SO$           | 222.04443      | 222.04441         | 0.10                 | Hydroxylation/<br>Dehydrogenation       |
| $[M-S+O+H]^+$    | $C_8H_{12}N_5O$         | 194.10367      | 194.10364         | 0.17                 | Desulfuration                           |
| $[M-S+O-2H+H]^+$ | $C_8H_{10}N_5O$         | 192.08794      | 192.08799         | 0.24                 | Desulfuration/<br>Dehydrogenation       |
| $[M-S+H]^+$      | $C_8H_{12}N_5$          | 178.10870      | 178.10872         | 0.12                 | Desulfuration                           |
| $[M-S-2H+H]^+$   | $C_8H_{10}N_5$          | 176.09303      | 176.09307         | 0.24                 | Desulfuration/<br>Dehydrogenation       |
| $[M-S-4H+H]^+$   | $C_8H_8N_5$             | 174.07747      | 174.07742         | 0.28                 | Desulfuration/<br>Dehydrogenation       |
| $[2M-2H+H]^+$    | $C_{16}H_{21}N_{10}S_2$ | 417.13843      | 417.13866         | 0.55                 | Disulfide formation                     |
| $[2M-4H+H]^+$    | $C_{16}H_{19}N_{10}S_2$ | 415.12292      | 415.12301         | 0.21                 | Disulfide formation/<br>Dehydrogenation |

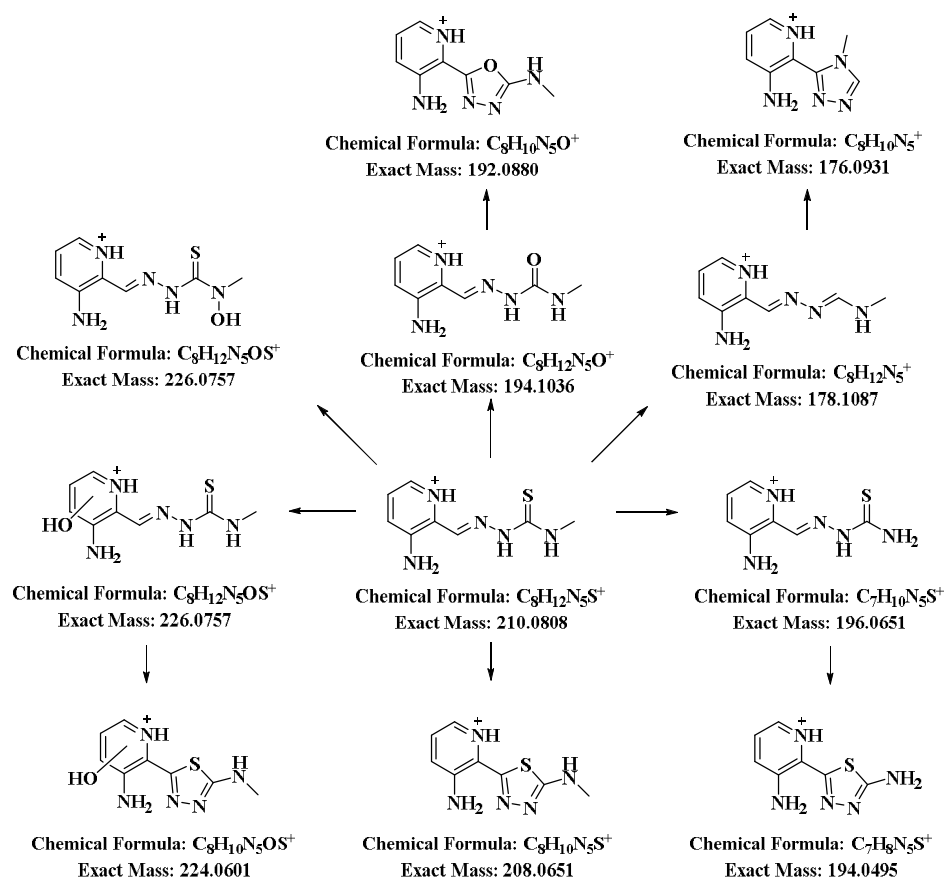

**Scheme S2** Metabolic pathways of **1** elucidated by LC-HRMS after incubation with cell-free microsomes

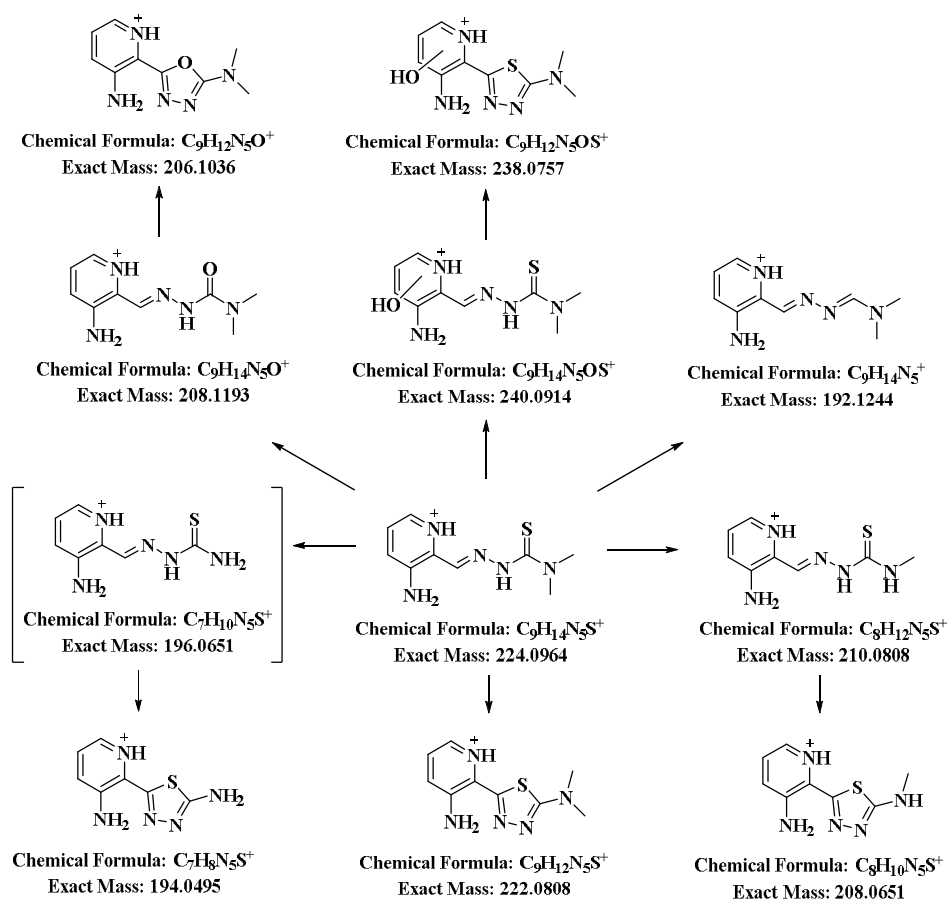

**Scheme S3** Metabolic pathways of **2** elucidated by LC-HRMS after incubation with cell-free microsomes

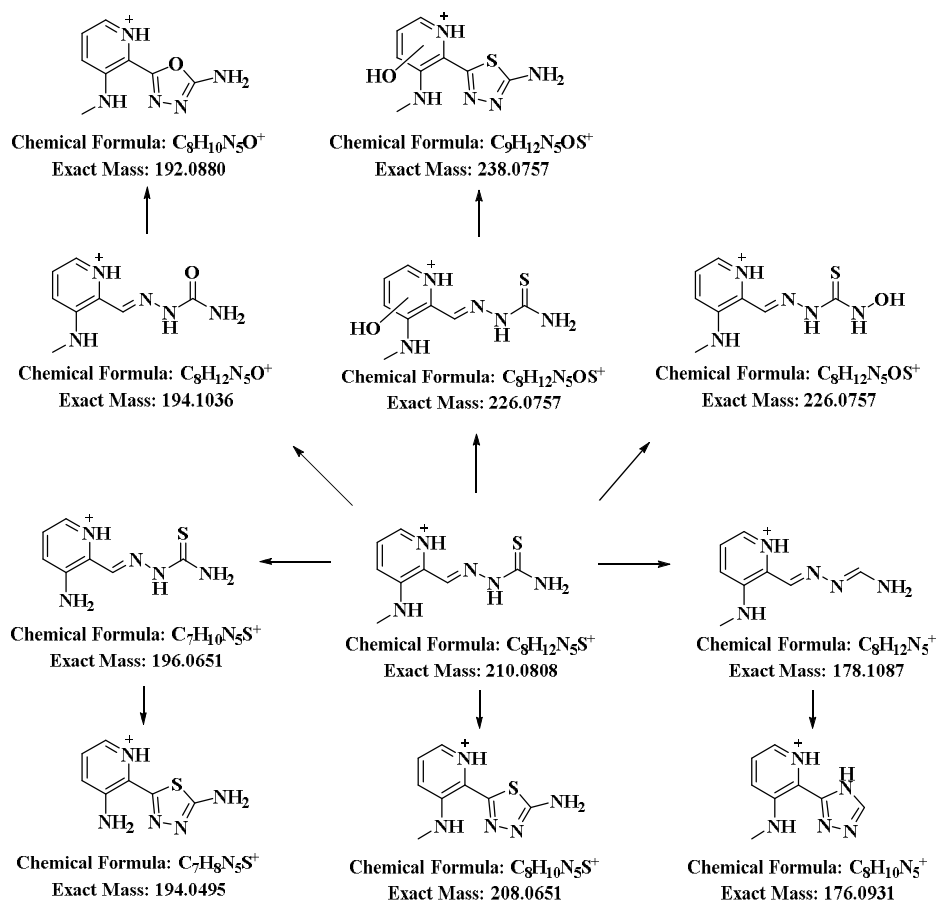

**Scheme S4** Metabolic pathways of **3** elucidated by LC-HRMS after incubation with cell-free microsomes

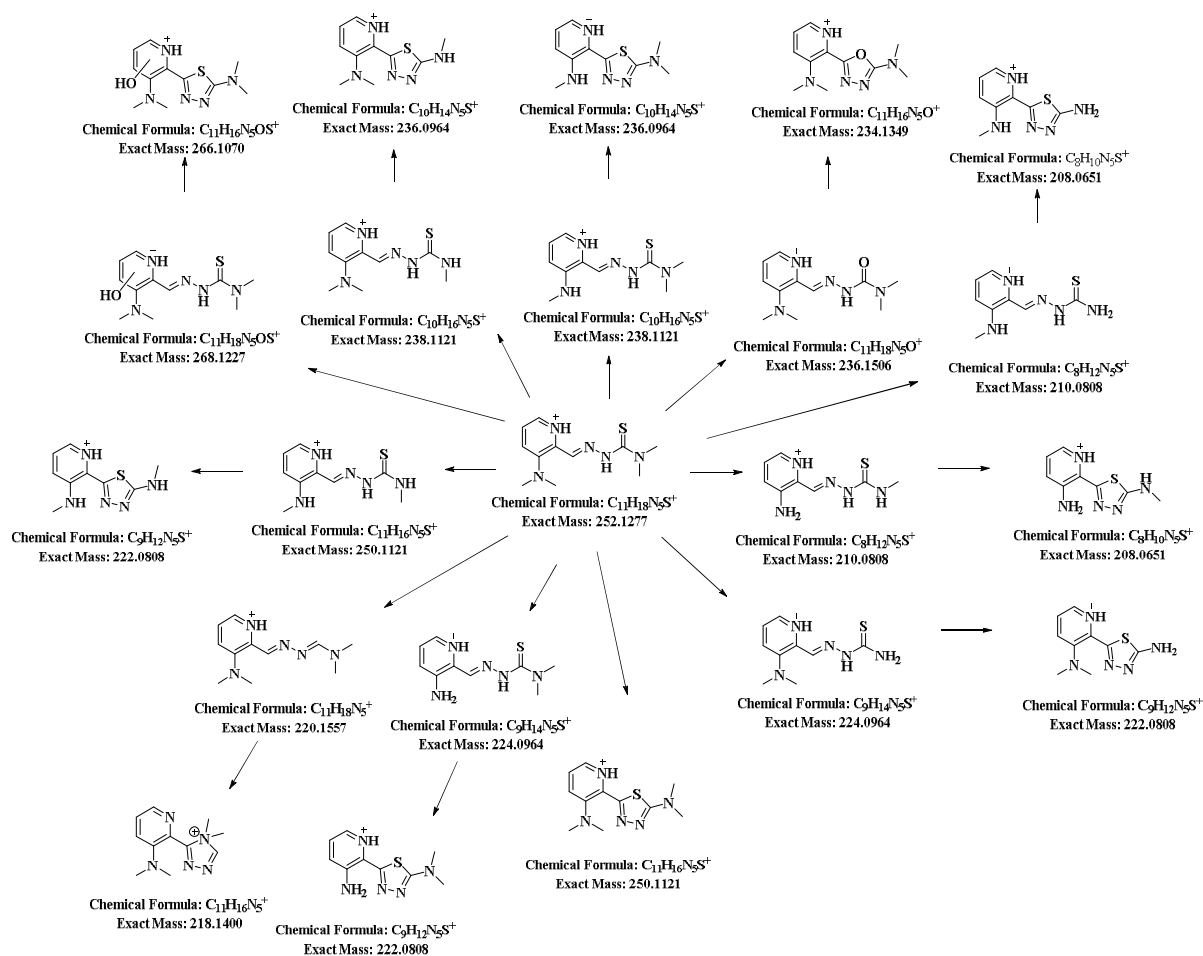

**Scheme S5** Metabolic pathways of **5** elucidated by LC-HRMS after incubation with cell-free microsomes

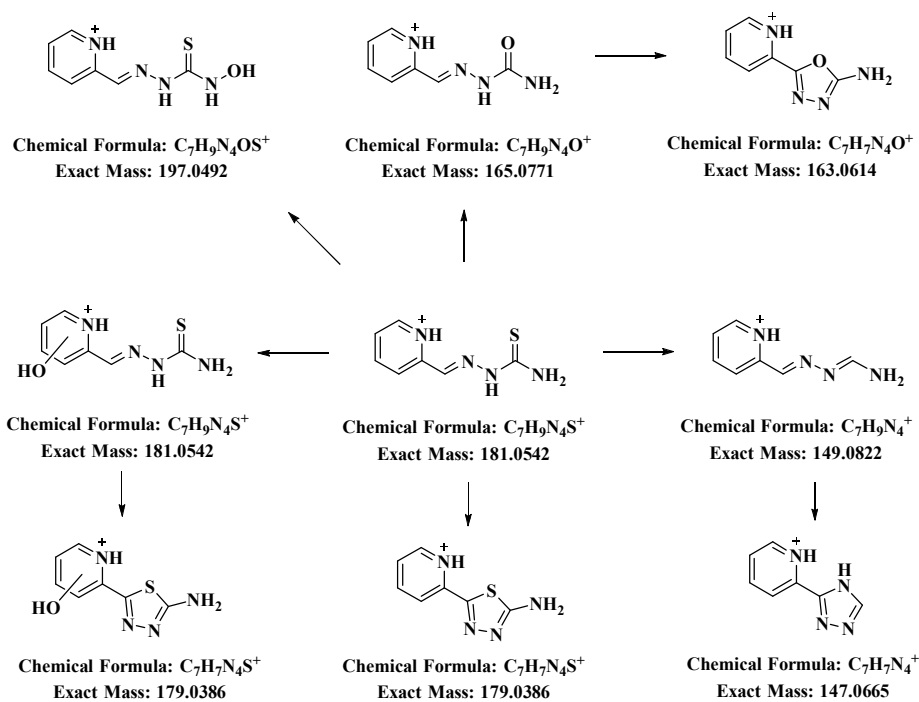

**Scheme S6** Metabolic pathways of **6** elucidated by LC-HRMS after incubation with cell-free microsomes

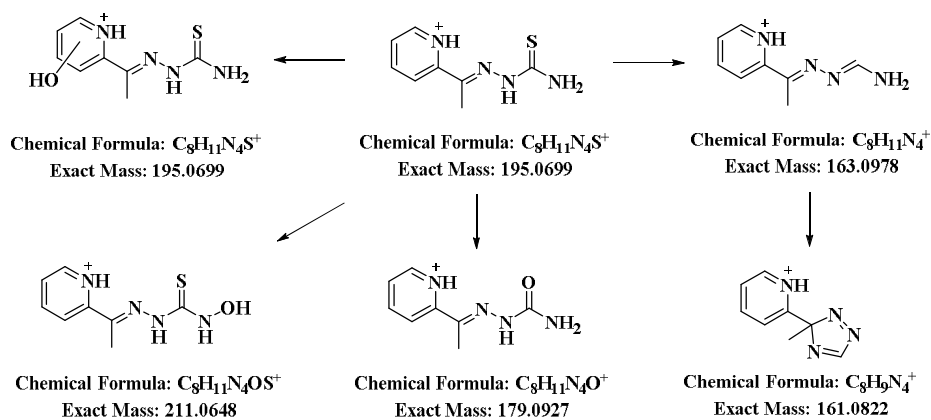

**Scheme S7** Metabolic pathways of **7** elucidated by LC-HRMS after incubation with cell-free microsomes

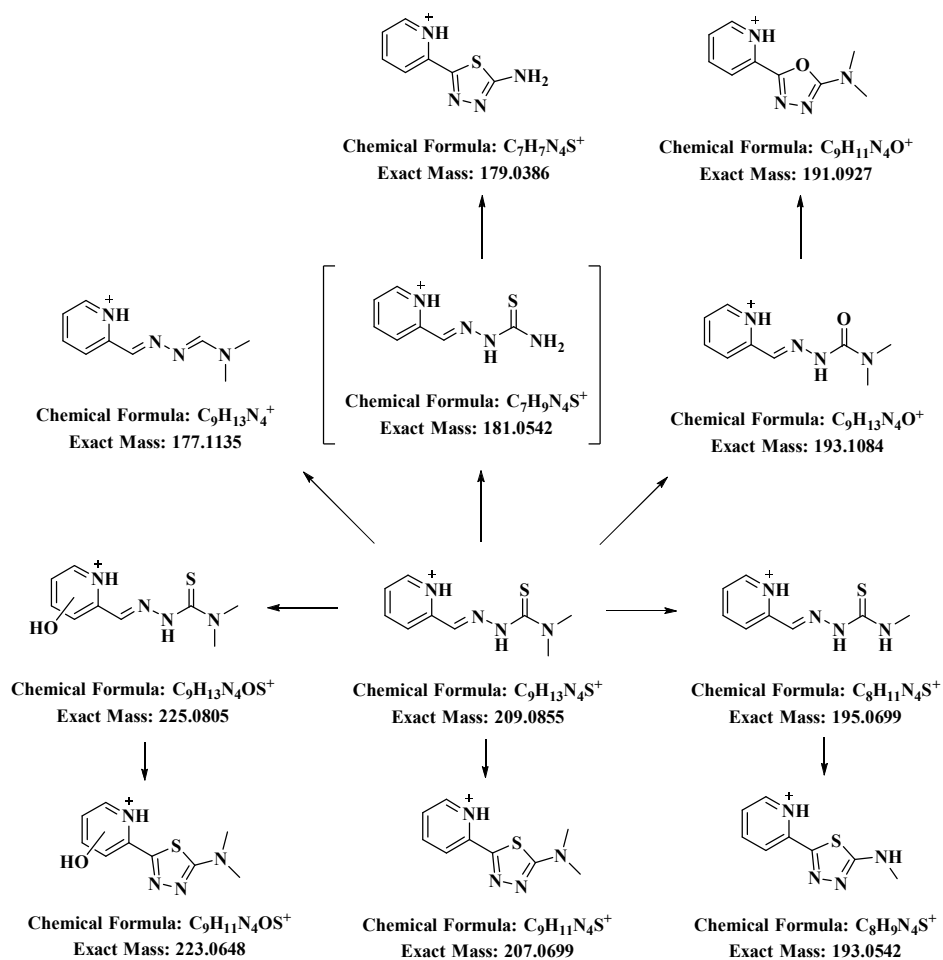

**Scheme S8** Metabolic pathways of **8** elucidated by LC-HRMS after incubation with cell-free microsomes

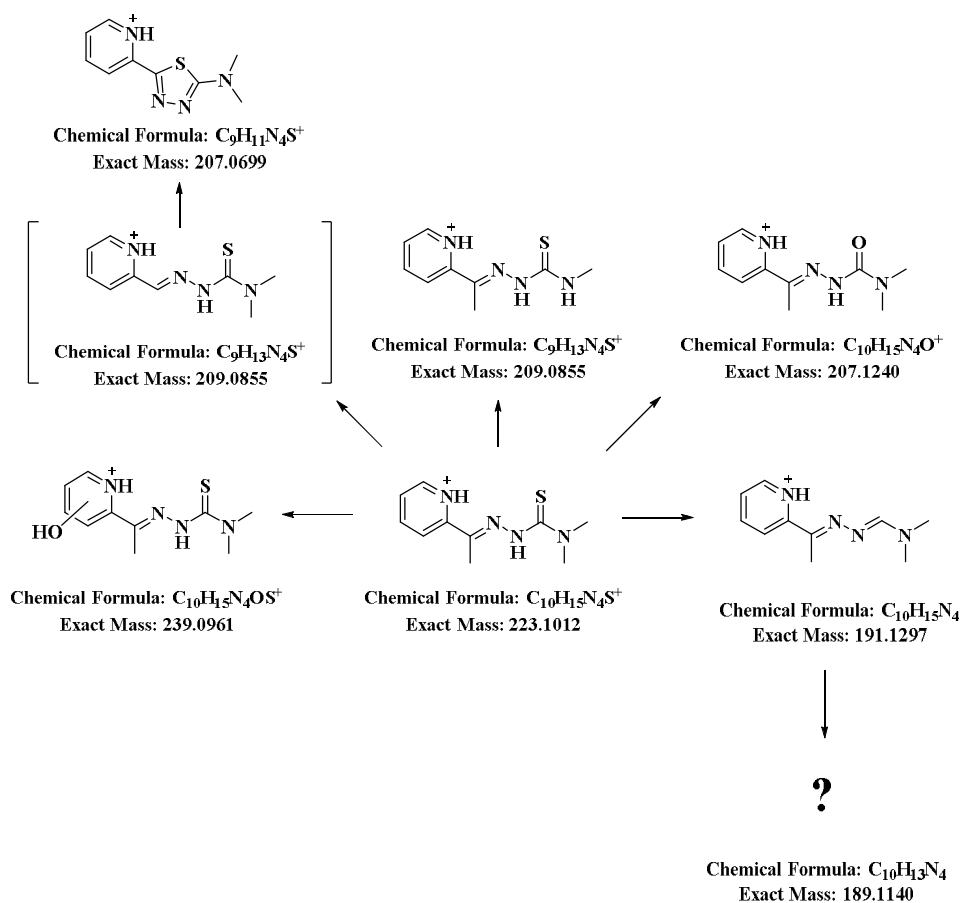

**Scheme S9** Metabolic pathways of **9** elucidated by LC-HRMS after incubation with cell-free microsomes



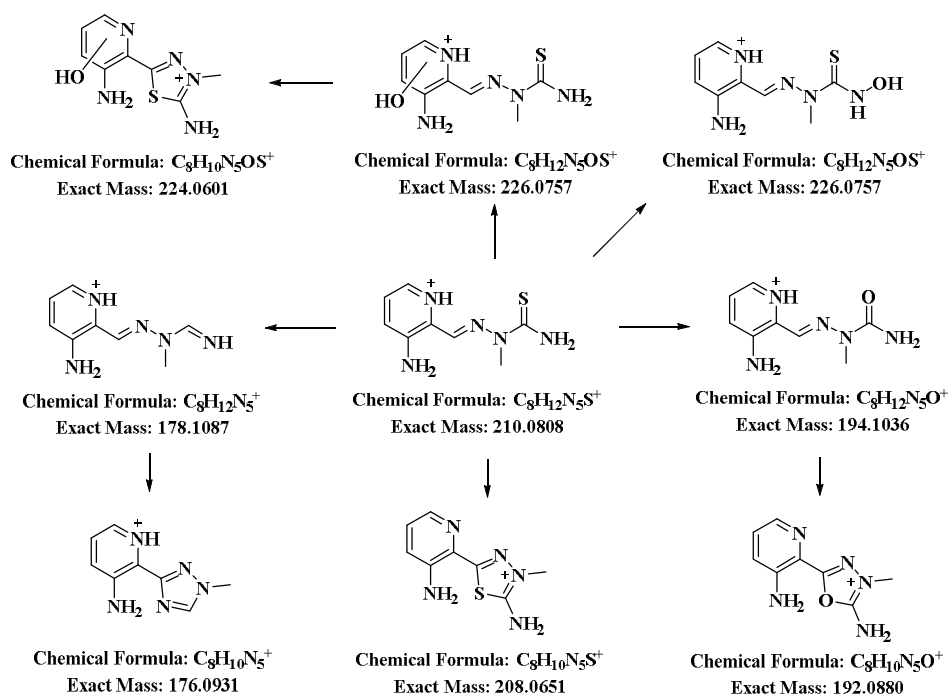

**Scheme S10** Metabolic pathways of **10** elucidated by LC-HRMS after incubation with cell-free microsomes

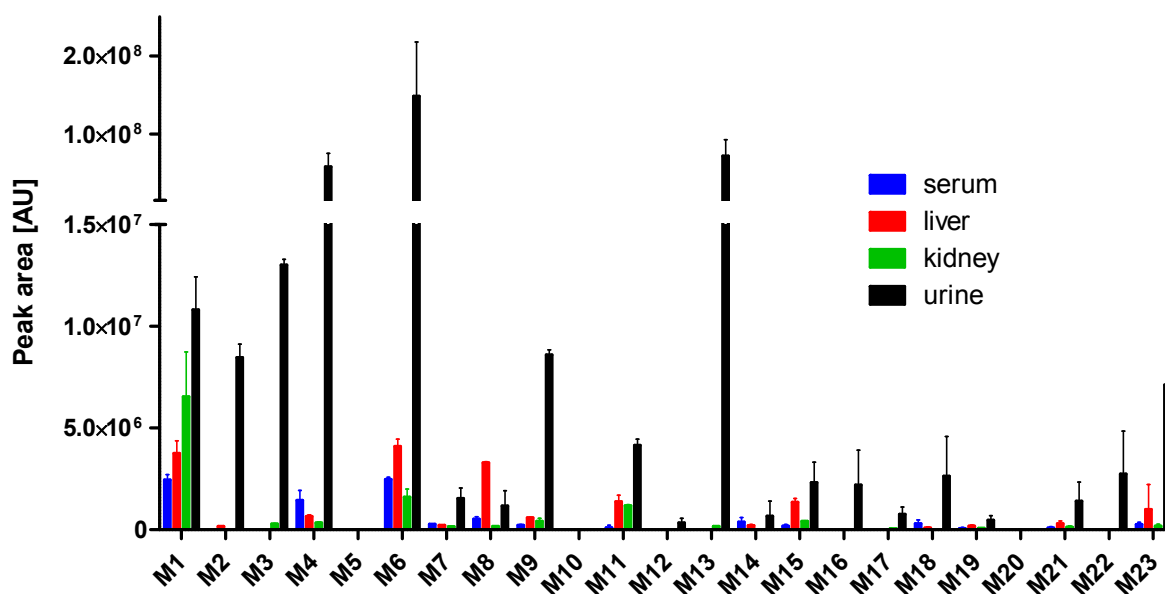

**Fig. S9** Relative quantification of metabolites 1–23 of compound **5** in serum/liver/kidney/urine samples of mice (zoom of the data of Figure 8)
